# Supplementary material for: Carbon-coated Ni/Al 2 O 3 as high-efficiency catalysts for the hydrogenation of furfural to furfuryl alcohol
Source: Royal Society of Chemistry journal article supplement (doi:10.1039/d5nj04404a), 2026-01-01
Supplement: d5nj04404a1.pdf [file d5nj04404a1.pdf]

# Electronic Supplementary Information

## Carbon coated Ni/Al<sub>2</sub>O<sub>3</sub> as high-efficiency catalysts for hydrogenation of furfural to furfuryl alcohol

Meng Ge,<sup>a,b</sup> Xin Ling,<sup>a,b</sup> Yanyan Liu,<sup>a,b\*</sup> Weiwei Lin<sup>a,b\*</sup>

<sup>a</sup>Anhui Laboratory of Functional Coordinated Complexes for Materials Chemistry and Application, Anhui Polytechnic University, Wuhu, 241000, China.

E-mail: linweiwei@ahpu.edu.cn.

<sup>b</sup>School of chemical and environmental Engineering, Anhui Polytechnic University, Wuhu, 241000, China. E-mail: liuyanyan@ahpu.edu.cn.

### Chemicals

Ni(NO<sub>3</sub>)<sub>2</sub>·6H<sub>2</sub>O (AR), Al(NO<sub>3</sub>)<sub>3</sub>·9H<sub>2</sub>O (AR), ethanol (AR, 97.0%), glucos (AR), furfural (AR, 99.0%), furfuryl alcohol (AR, 98%), tetrahydrofurfuryl alcohol (AR, 98%), 2-methylfuran (AR, 98%), n-butanol (AR, 99.5%), isopropanol (AR), methylbenzene (AR), n-hexane (AR) and dioxane (AR) were purchased from Sinopharm Group Chemical Reagent Co. Ltd. They were all used directly.

### Catalysts characterization

The crystal structure of the samples was analyzed by SHIMADZU LabXRD-6100 X-ray diffractometer with a Cu-K<sub>α</sub> source ( $\lambda = 0.154$  nm). The test was conducted with a tube voltage of 40 kV and a tube current of 30 mA, with a scanning range set from 5° to 70° and a scanning rate of 4°/min. The carbon content of the catalysts was analyzed by thermogravimetric analysis (TGA) using a NETZSCH TG 209 F3 thermogravimetric analyzer. The test was performed under an air atmosphere with a temperature range of 40-700 °C and a heating rate of 10 °C per minute. The microscopic morphology of the catalyst was observed by a Hitachi FESEM SU8600 field emission scanning electron microscope. Transmission electron microscopy (TEM) was carried out using a FEI Tecnai F20 instrument at an acceleration voltage of 200 kV. For the TEM sample preparation, the catalyst was ultrasonically dispersed in ethanol for 10 min and the resulting suspension was drop-cast onto a carbon-film-coated copper grid. High-angle annular dark-field scanning transmission electron microscopy (HAADF-STEM) was conducted on the Thermal fisher Spectra 300 with an acceleration voltage of 300 kV. X-ray photoelectron spectroscopy (XPS) analysis was conducted using a Thermo Fisher Escalab 250Xi spectrometer with an Al-K<sub>α</sub> X-ray source. The working voltage and current were 14.8 kV and 4.5 mA, respectively. Ar<sup>+</sup> ion etching was carried out before the test and the C 1s peak (284.8 eV) of adventitious carbon was used as the reference. The specific surface area, pore volume and average pore diameter were determined by Brunauer-Emmett-Teller (BET) adsorption

measurements on a Micromeritics TriStar II 3020 analyzer. ICP-OES measurements were performed on an Agilent 720ES spectrometer with a radio frequency (RF) power of 1200 W and a nebulizer flow rate of 0.75 L/min.

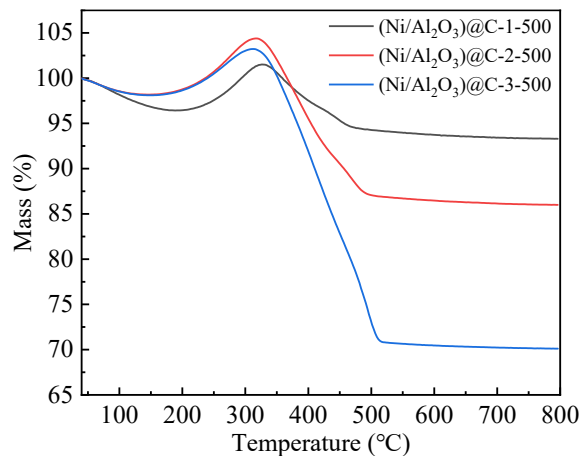

Fig. S1 TGA curve of the carbon coated Ni/Al<sub>2</sub>O<sub>3</sub> catalysts.

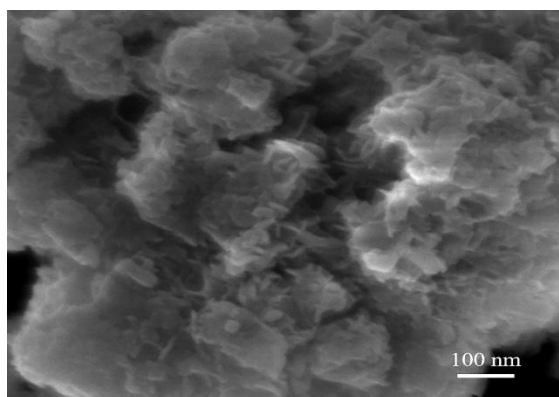

Fig. S2 SEM image of the Ni<sub>2</sub>Al-LDH

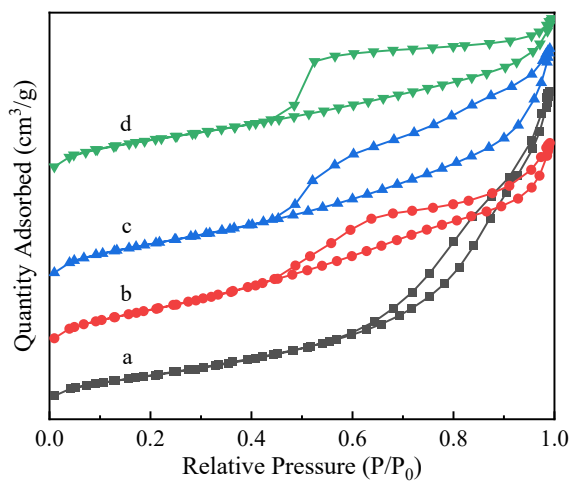

Fig. S3 N<sub>2</sub> adsorption-desorption isotherms of Ni/Al<sub>2</sub>O<sub>3</sub> (a), (Ni/Al<sub>2</sub>O<sub>3</sub>)@C-1-500 (b), (Ni/Al<sub>2</sub>O<sub>3</sub>)@C-500 (c), (Ni/Al<sub>2</sub>O<sub>3</sub>)@C-500 (d).

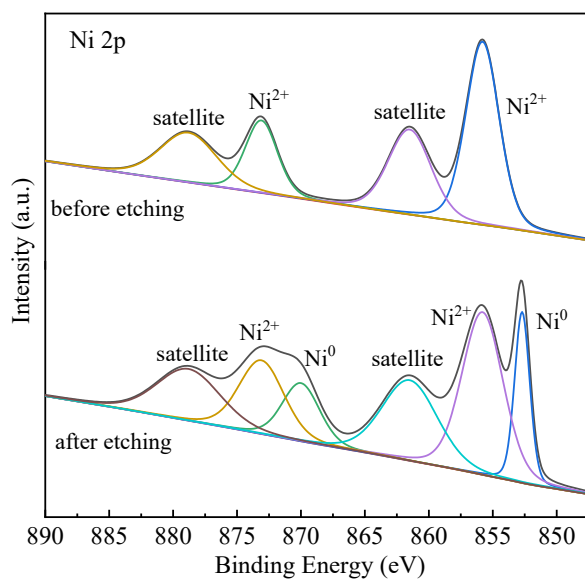

Fig. S4 XPS spectrum of Ni 2p in Ni/Al<sub>2</sub>O<sub>3</sub>.

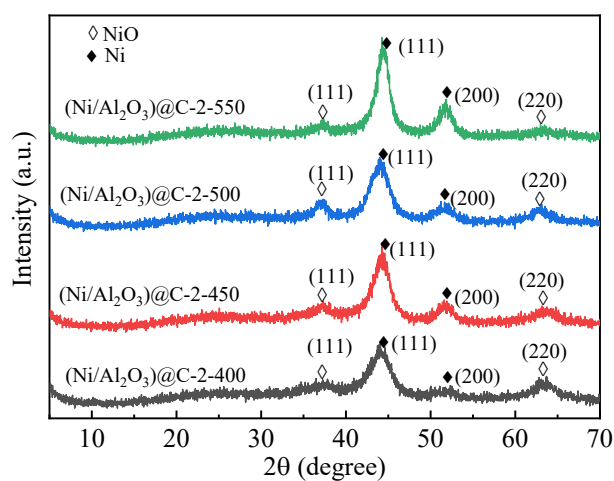

Fig. S5 XRD patterns of (Ni/Al<sub>2</sub>O<sub>3</sub>)@C-2 at different calcination temperatures.

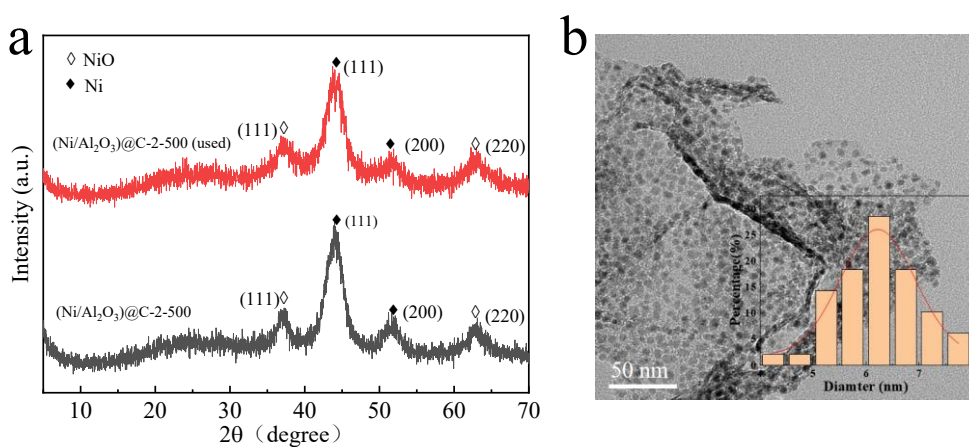

Fig. S6 (a) XRD patterns of catalyst (Ni/Al<sub>2</sub>O<sub>3</sub>)@C-2-500 before and after usage; (b) TEM image and particle size distributions of (Ni/Al<sub>2</sub>O<sub>3</sub>)@C-2-500 after usage.

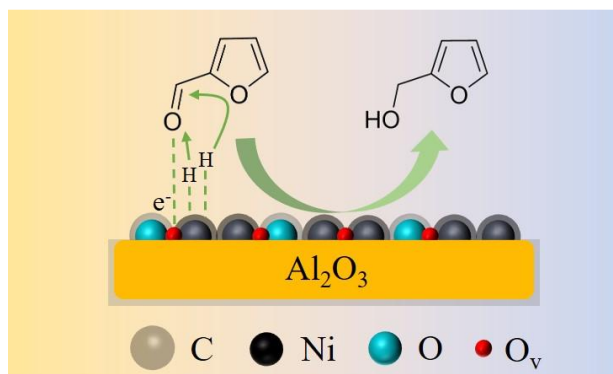

Scheme S1 Proposed reaction mechanism of FF to FA over the (Ni/Al<sub>2</sub>O<sub>3</sub>)@C-2-500 catalyst.

Table. S1 Relative amount of Ni species as quantified by XPS spectra of Ni 2p<sub>3/2</sub> in different catalysts.

| Entry | Catalysts                                    | Relative amount of Ni species (%) |                  |
|-------|----------------------------------------------|-----------------------------------|------------------|
|       |                                              | Ni <sup>0</sup>                   | Ni <sup>2+</sup> |
| 1     | Ni/Al <sub>2</sub> O <sub>3</sub>            | 0                                 | 100              |
| 2     | (Ni/Al <sub>2</sub> O <sub>3</sub> )@C-1-500 | 25.6                              | 74.4             |
| 3     | (Ni/Al <sub>2</sub> O <sub>3</sub> )@C-2-500 | 27.1                              | 72.9             |
| 4     | (Ni/Al <sub>2</sub> O <sub>3</sub> )@C-3-500 | 50.5                              | 49.5             |

Table. S2 Proportions of O species as quantified by XPS spectra of O 1s in different catalysts.

| Entry | Catalysts                                    | Relative amount of O species (%) |                |                  |
|-------|----------------------------------------------|----------------------------------|----------------|------------------|
|       |                                              | O <sub>L</sub>                   | O <sub>V</sub> | O <sub>ads</sub> |
| 1     | Ni/Al <sub>2</sub> O <sub>3</sub>            | 51.1                             | 24.8           | 24.1             |
| 2     | (Ni/Al <sub>2</sub> O <sub>3</sub> )@C-1-500 | 29.2                             | 33.9           | 36.9             |
| 3     | (Ni/Al <sub>2</sub> O <sub>3</sub> )@C-2-500 | 20.0                             | 38.0           | 42.0             |
| 4     | (Ni/Al <sub>2</sub> O <sub>3</sub> )@C-3-500 | 3.2                              | 26.0           | 70.8             |

Table. S3 Comparison of the catalytic hydrogenation of FF to FA among (Ni/Al<sub>2</sub>O<sub>3</sub>)@C-2-500 and other Ni-based catalysts.

| Catalysts                                    | m <sub>FF</sub> /m <sub>Cat.</sub> | t/h | T/°C | Solvent     | P/MPa | Con./% | Sel./% | Ref.         |
|----------------------------------------------|------------------------------------|-----|------|-------------|-------|--------|--------|--------------|
| Ni/Al <sub>2</sub> O <sub>3</sub>            | 1.0                                | 1   | 100  | Isopropanol | 2     | 98.5   | 31.3   | <sup>1</sup> |
| Ni/TiO <sub>2</sub>                          | 2.0                                | 3   | 130  | Dioxane     | 3     | 68.7   | 52.4   | <sup>2</sup> |
| 5%Ni/AC                                      | 4.0                                | 3   | 130  | Isopropanol | 2     | 21.5   | 71.5   | <sup>3</sup> |
| Ni/C-500                                     | 5.8                                | 0.5 | 80   | Ethanol     | 1     | 91.5   | 58.0   | <sup>4</sup> |
| Ni/MgO                                       | 5.8                                | 2   | 200  | Isopropanol | 2     | 97.7   | 94.7   | <sup>5</sup> |
| NiFe <sub>2</sub> O <sub>4</sub>             | 3.3                                | 4   | 180  | Isopropanol | 0     | 95.0   | 90.0   | <sup>6</sup> |
| (Ni/Al <sub>2</sub> O <sub>3</sub> )@C-2-500 | 10.0                               | 0.5 | 120  | Water       | 1     | 96.4   | 89.4   | This work    |

## References

- 1 Y. Yang, J. Ma, X. Jia, Z. Du, Y. Duan and J. Xu, *RSC Adv.*, 2016, **6**, 51221-51228.
- 2 A. S. Rajpurohit, V. R. M. Talla, M. Jaccob, K. K. Ramaswamy and B. Viswanathan, *Sustain. Energy Fuels*, 2023, **7**, 2861-2872.
- 3 L. J. Malobela, J. Heveling, W. G. Augustyn and L. M. Cele, *Ind. Eng. Chem. Res.*, 2014, **53**,

13910-13919.

- 4 Y. Su, C. Chen, X. Zhu, Y. Zhang, W. Gong, H. Zhang, H. Zhao and G. Wang, *Dalton Trans.*, 2017, **46**, 6358-6365.
- 5 J. Qi, Y. Ren, L. Zhang and X. Hu, *New J. Chem.*, 2023, **47**, 16828-16834.
- 6 J. He, S. Yang and A. Riisager, *Catal. Sci. Technol.*, 2018, **8**, 790-797.
